# Supplementary material for: Reliable scaling of position weight matrices for binding strength comparisons between transcription factors
Source: PubMed Central journal article supplement (PMC4545934; doi:10.1186/s12859-015-0666-1), 2015-08-20
Supplement: 12859_2015_666_MOESM1_ESM.pdf [file 12859_2015_666_MOESM1_ESM.pdf]

log(number of unique k-mers) in genome background

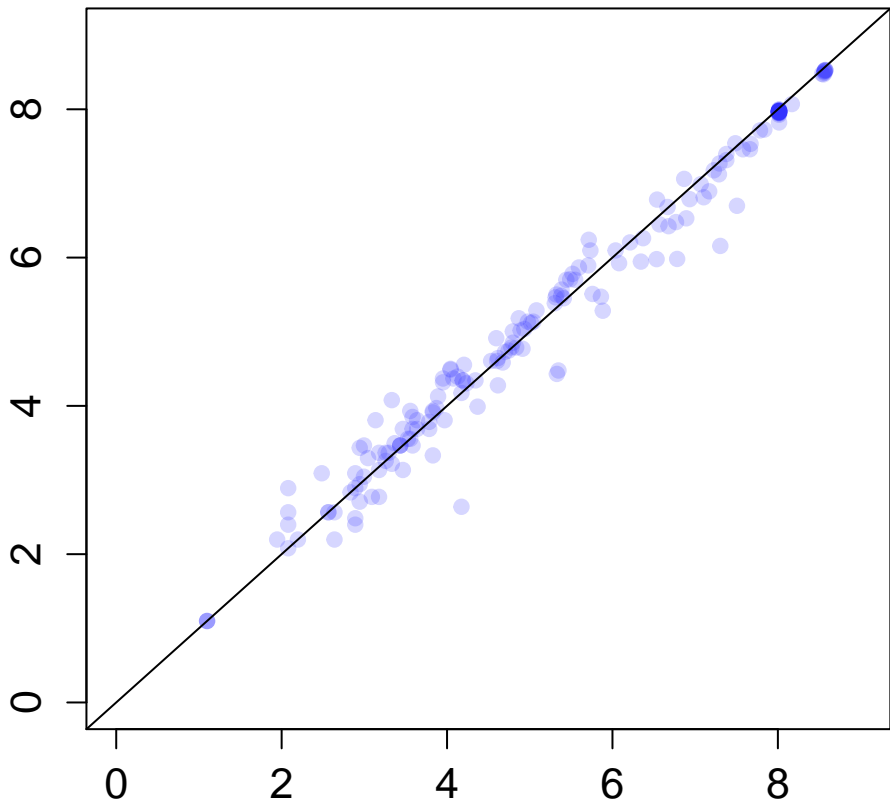

log(number of unique k-mers) in random sequences
