# Supplementary material for: Reliable scaling of position weight matrices for binding strength comparisons between transcription factors
Source: PubMed Central journal article supplement (PMC4545934; doi:10.1186/s12859-015-0666-1), 2015-08-20

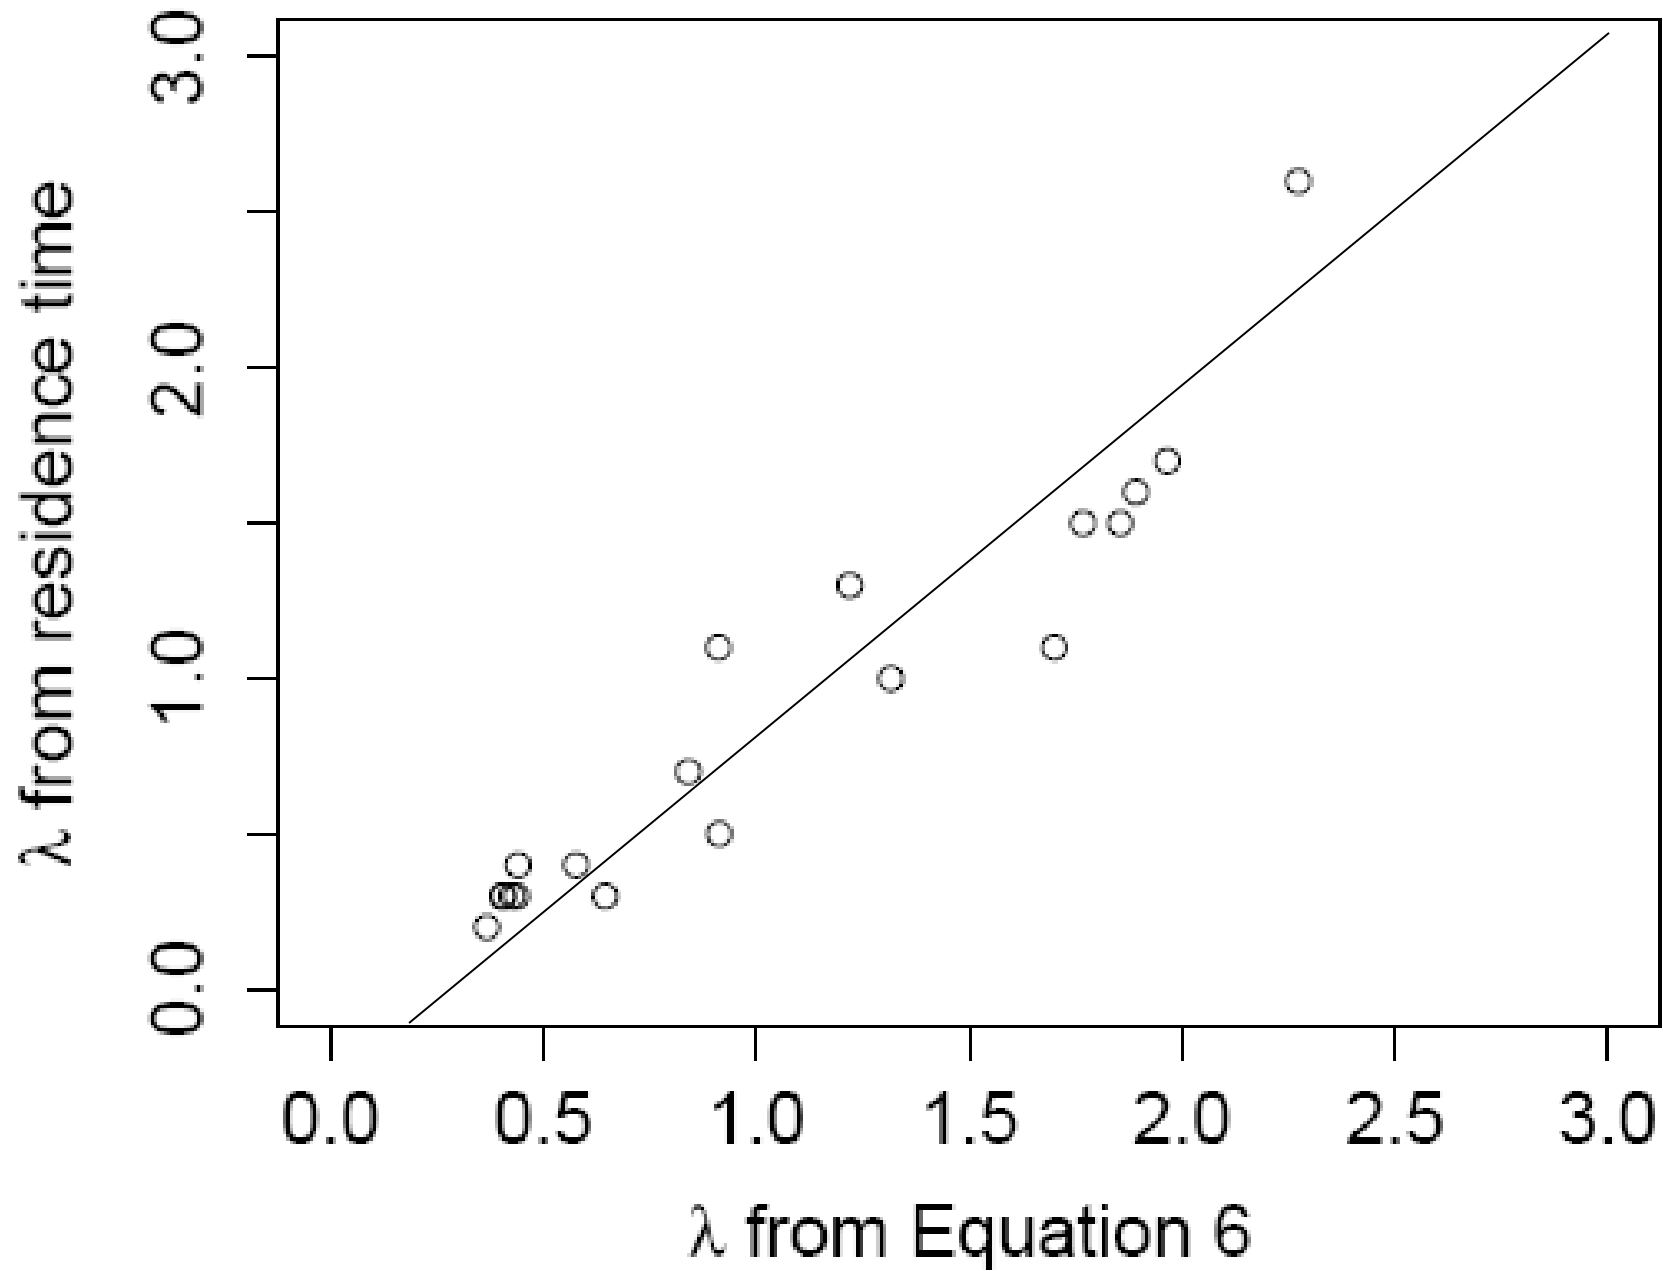

Supplement: 12859_2015_666_MOESM10_ESM.pdf [file 12859_2015_666_MOESM10_ESM.pdf]
